# Supplementary material for: First Evidence for a Massive Extinction Event Affecting Bees Close to the K-T Boundary
Source: PubMed Central journal article supplement (PMC3806776; doi:10.1371/journal.pone.0076683), 2013-10-23

Time before present (Mya)

100 80 60 40 20 0

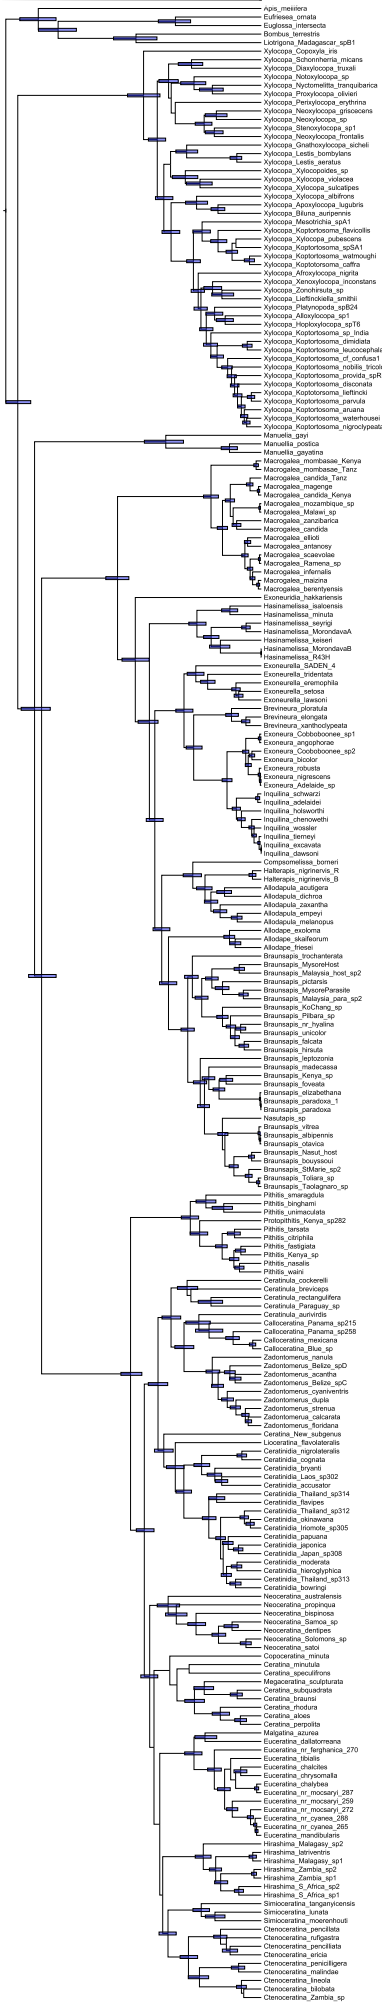

Supplement: pone.0076683.s003.pdf [file pone.0076683.s003.pdf]
